# Supplementary material for: Relationship between Urinary N-Desmethyl-Acetamiprid and Typical Symptoms including Neurological Findings: A Prevalence Case-Control Study
Source: PLOS journal article supplement (doi:10.1371/journal.pone.0142172), 2015-11-04
Supplement: S8 (10.1371/journal.pone.0142172.s008) [file journal.pone.0142172.s008]

Supporting Information

**Relationship between urinary *N*-desmethyl-acetamidiprid and typical symptoms including neurological findings: A prevalence case-control study**

Jemima Tiwaa Marfo<sup>1</sup>, Kazutoshi Fujioka<sup>2</sup>, Yoshinori Ikenaka<sup>1,3</sup>, Shouta M. M. Nakayama<sup>1</sup>,

Hazuki Mizukawa<sup>4</sup>, Yoshiko Aoyama<sup>5</sup>, Mayumi Ishizuka<sup>1</sup>, Kumiko Taira<sup>6\*</sup>

<sup>1</sup>Laboratory of Toxicology, Department of Environmental Science, Faculty of Veterinary

Medicine, Hokkaido University, Hokkaido, Japan

<sup>2</sup>Hawaii Institute of Molecular Education, Hawaii, US

<sup>3</sup>Water Research Group, School of Environmental Sciences and Development, North-West

University, South Africa

<sup>4</sup>Department of Environmental Science, Faculty of Veterinary Medicine, Hokkaido

University, Hokkaido, Japan

<sup>5</sup>Aoyama Allergy Clinic, Gunma, Japan

<sup>6</sup>Department of Anesthesiology, Tokyo Women's Medical University Medical Center East,

Tokyo, Japan

**S3 Table. Physicochemical characteristics of neonicotinoid insecticides.**

|                     |           |                                                 |                       | <b>Solubility (g/L)</b> |                |                |
|---------------------|-----------|-------------------------------------------------|-----------------------|-------------------------|----------------|----------------|
|                     | <b>MW</b> | <b>pK<sub>a</sub> of<br/>conjugate<br/>acid</b> | <b>pK<sub>a</sub></b> | <b>Water<br/>(pH 7)</b> | <b>Octanol</b> | <b>Acetone</b> |
| <b>Thiamethoxam</b> | 291.7     | N/A                                             | N/A                   | 4.1                     | 0.62           | 48             |
| <b>Clothianidin</b> | 249.7     | N/A                                             | 11.1                  | 0.327                   | 1.64           | 15.2           |
| <b>Acetamiprid</b>  | 222.7     | 0.7                                             | N/A                   | 2.95                    | 18.5           | >200           |
| <b>Imidacloprid</b> | 255.7     | 1.56                                            | 11.1                  | 0.48                    | 0.78           | 47             |
| <b>Thiacloprid</b>  | 252.7     | N/A                                             | N/A                   | 0.185                   | 3.36           | 64             |
| <b>Nitenpyram</b>   | 270.7     | 3.1                                             | 11.5                  | 840                     | 192            | 290            |
| <b>Dinotefuran</b>  | 202.2     | N/A                                             | 12.6                  | 40                      | -              | 58             |
| <b>Sulfoxaflor</b>  | 277.3     | N/A                                             | N/A                   | 0.568                   | 1.66           | 217            |

Note: pK<sub>a</sub> stands for the acid dissociation constant of the molecule (M) or the conjugated acid (MH<sup>+</sup>). N/A stands for not available. Although pK<sub>a</sub> of conjugated acid are not known for thiamethoxam, clothianidin or thiacloprid, they theoretically exist because pseudo-molecule ions [MH<sup>+</sup>] of those NN are monitored in the positive mode by electrospray ionization mass spectrometry.

Reference:

US Environmental Protection Agency (USEPA) Factsheet-Acetamiprid. 2002.

National Pesticide Information Center. 1.800.858.7378. Imidacloprid Technical Fact Sheet A Rule by the US Environmental Protection Agency (USEPA) on 03/02/2012.

Thiamethoxam; Pesticide Tolerance. Fed Regist 78:18512-18513

US Environmental Protection Agency (USEPA) Factsheet-clothianidin.2003.

US Environmental Protection Agency (USEPA) Factsheet-thiacloprid. 2003.

US Environmental Protection Agency (USEPA) Factsheet-dinotefuran. 2004.
